# Supplementary material for: Anti-Cancer and Anti-Inflammatory Activities of a Short Molecule, PS14 Derived from the Virulent Cellulose Binding Domain of Aphanomyces invadans, on Human Laryngeal Epithelial Cells and an In Vivo Zebrafish Embryo Model
Source: MDPI journal article supplement (doi:10.3390/molecules27217333), 2022-10-28
Supplement: s1 [file s1]

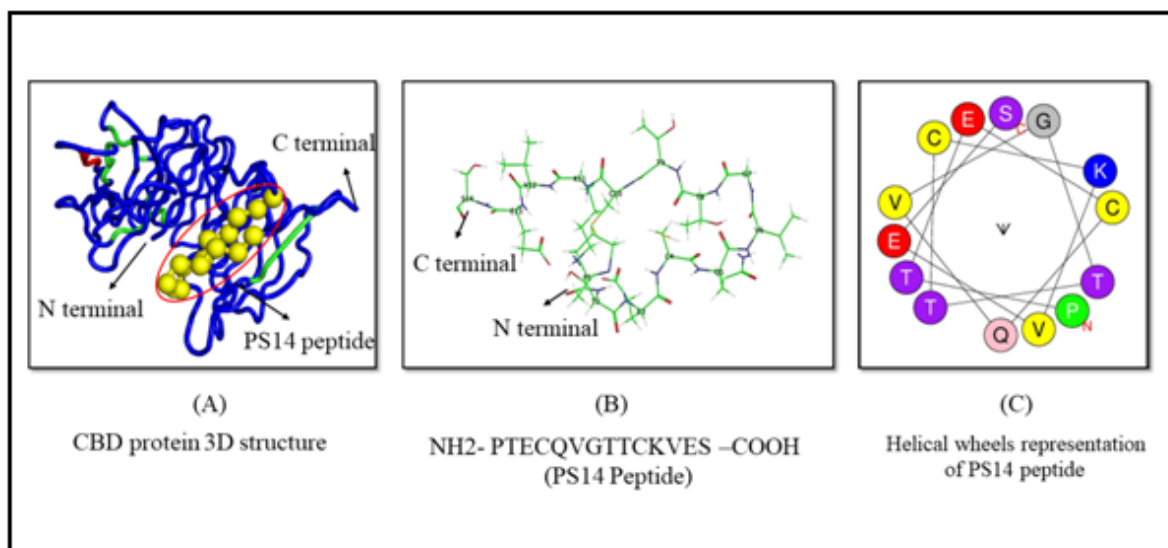

**E-Suppl. Fig. S1.** Bioinformatic analysis of CBD protein and its derived molecule, PS14.

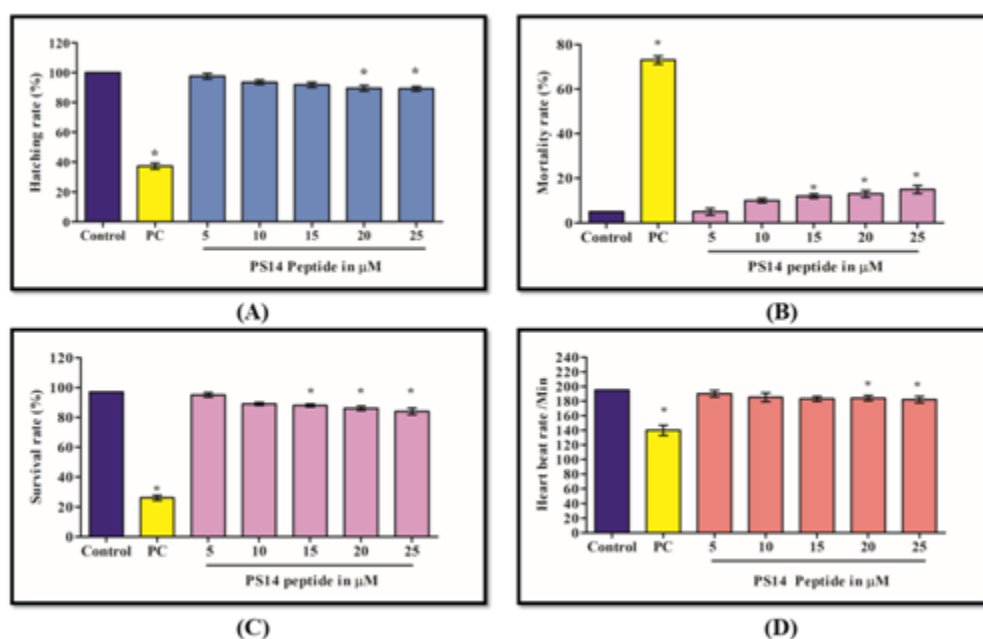

**E-Suppl. Fig. S2.** *In-vivo* toxicity of zebrafish larvae treated with five different concentrations of PS14. The untreated individuals were considered as control and larvae treated with 1 mM of H<sub>2</sub>O<sub>2</sub> was considered as positive control (PC). (A) The hatching rate was calculated at 48 hpf; (B) The mortality rate was calculated at 96 hpf; (C) The survival rate was calculated at 96 hpf; and (D) The heart rate was calculated at 72 hpf. The data was compared with the untreated control, which showed a level of significance at  $p < 0.05$  that was represented by \*. The data was provided as mean  $\pm$  SD of three independent experiments.

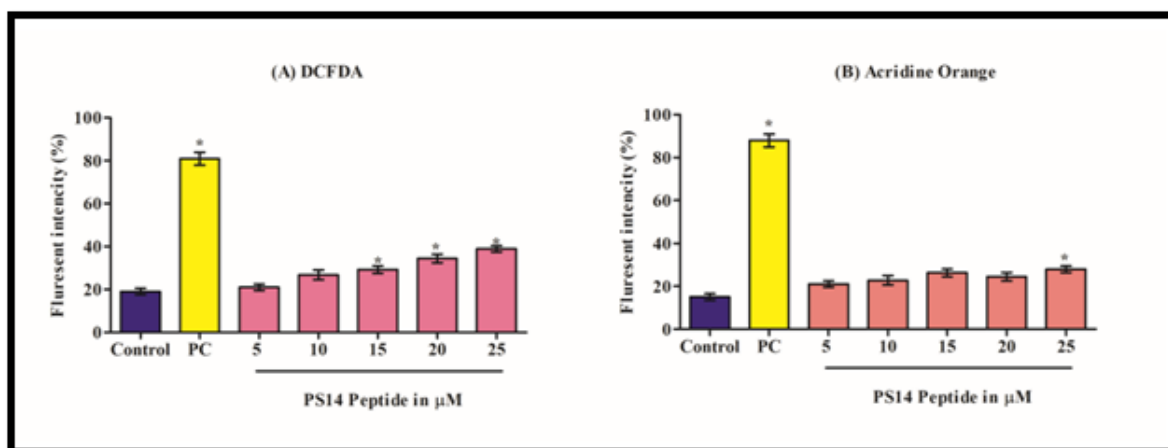

**E-Suppl. Fig. S3.** Quantitative measurement of the fluorescent intensity in zebrafish larvae, images processed in image J software. **(A)** DCFDA staining and **(B)** Acridine orange staining assay. Experiments were performed in triplicates and the data were expressed as mean  $\pm$  SD of three replicates. The asterix (\*) represents the statistical significance at  $p < 0.05$  compared to the control.

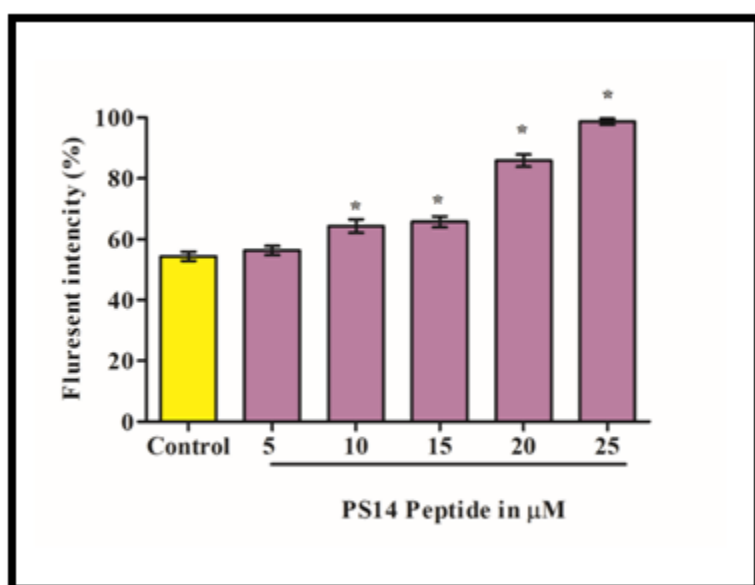

**E-Suppl. Fig. S4.** *In-vitro* ROS generation potential of PS14 against Hep-2 cells. The bar showed the quantitative measurement of the fluorescent intensity; images are processed in image J software. Experiments were performed in triplicate and the data were expressed as mean  $\pm$  SD. The asterix (\*) represents the statistical significance at  $p < 0.05$  compared to the control.
